# Supplementary material for: Surface termination of MgB2 unveiled by a combination of adsorption experiments and theoretical calculations
Source: Royal Society of Chemistry journal article supplement (doi:10.1039/c9cp00771g), 2019-01-01
Supplement: c9cp00771g1.pdf [file c9cp00771g1.pdf]

## Electronic supporting information:

### Surface termination of $\text{MgB}_2$ unveiled by a combination of adsorption experiments and theoretical calculations

Barbora Prudilová,<sup>a</sup> Eva Otyepková,<sup>a</sup> Jindřich Fanfrlík,<sup>b</sup> Drahomír Hnyk,<sup>c</sup> Josef Holub,<sup>c</sup> Martin Petr,<sup>a</sup> Jan Filip,<sup>a</sup> Klára Čepe,<sup>a</sup> Petr Lazar<sup>a\*</sup> and Michal Otyepka<sup>a\*</sup>

<sup>a</sup> Regional Centre of Advanced Technologies and Materials, Department of Physical Chemistry, Faculty of Science, Palacký University Olomouc, tř. 17. listopadu 12, 77 146 Olomouc, Czech Republic

<sup>b</sup> Institute of Organic Chemistry and Biochemistry, Czech Academy of Sciences, Flemingovo nám. 2, 166 10 Praha 6, Czech Republic

<sup>c</sup> Institute of Inorganic Chemistry, Czech Academy of Sciences, 250 68 Husinec - Řež, Czech Republic

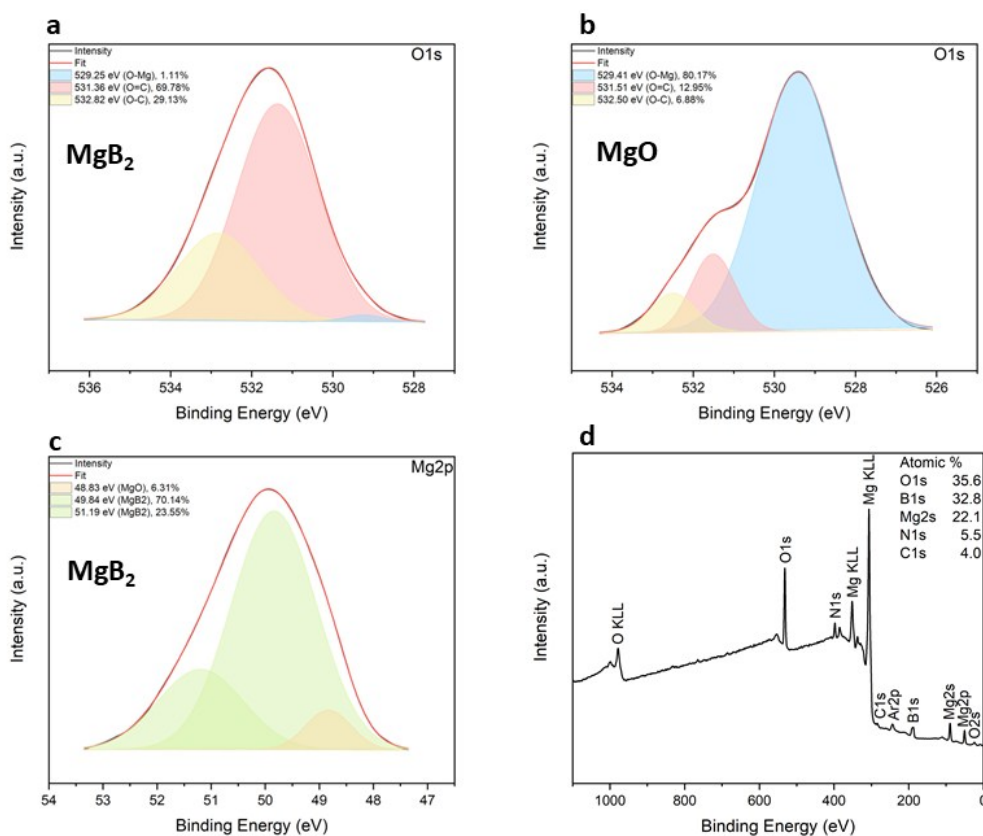

**Figure S1:** High-resolution O 1s XPS spectra of a) studied  $\text{MgB}_2$ , b) reference  $\text{MgO}$  sample c) Mg 2p spectrum of studied  $\text{MgB}_2$  and d) survey XPS spectrum of studied  $\text{MgB}_2$ .
